# Supplementary material for: Isolation and phylogenetic analysis of canine distemper virus among domestic dogs in Vietnam
Source: PubMed Central journal article supplement — J Vet Med Sci. 2016 Oct 14;79(1):123–7. doi: 10.1292/jvms.16-0394 (PMC5289248; doi:10.1292/jvms.16-0394), 2016-10-14
Supplement: jvms-79-123-s001.pdf [file jvms-79-123-s001.pdf]

Fig.S1

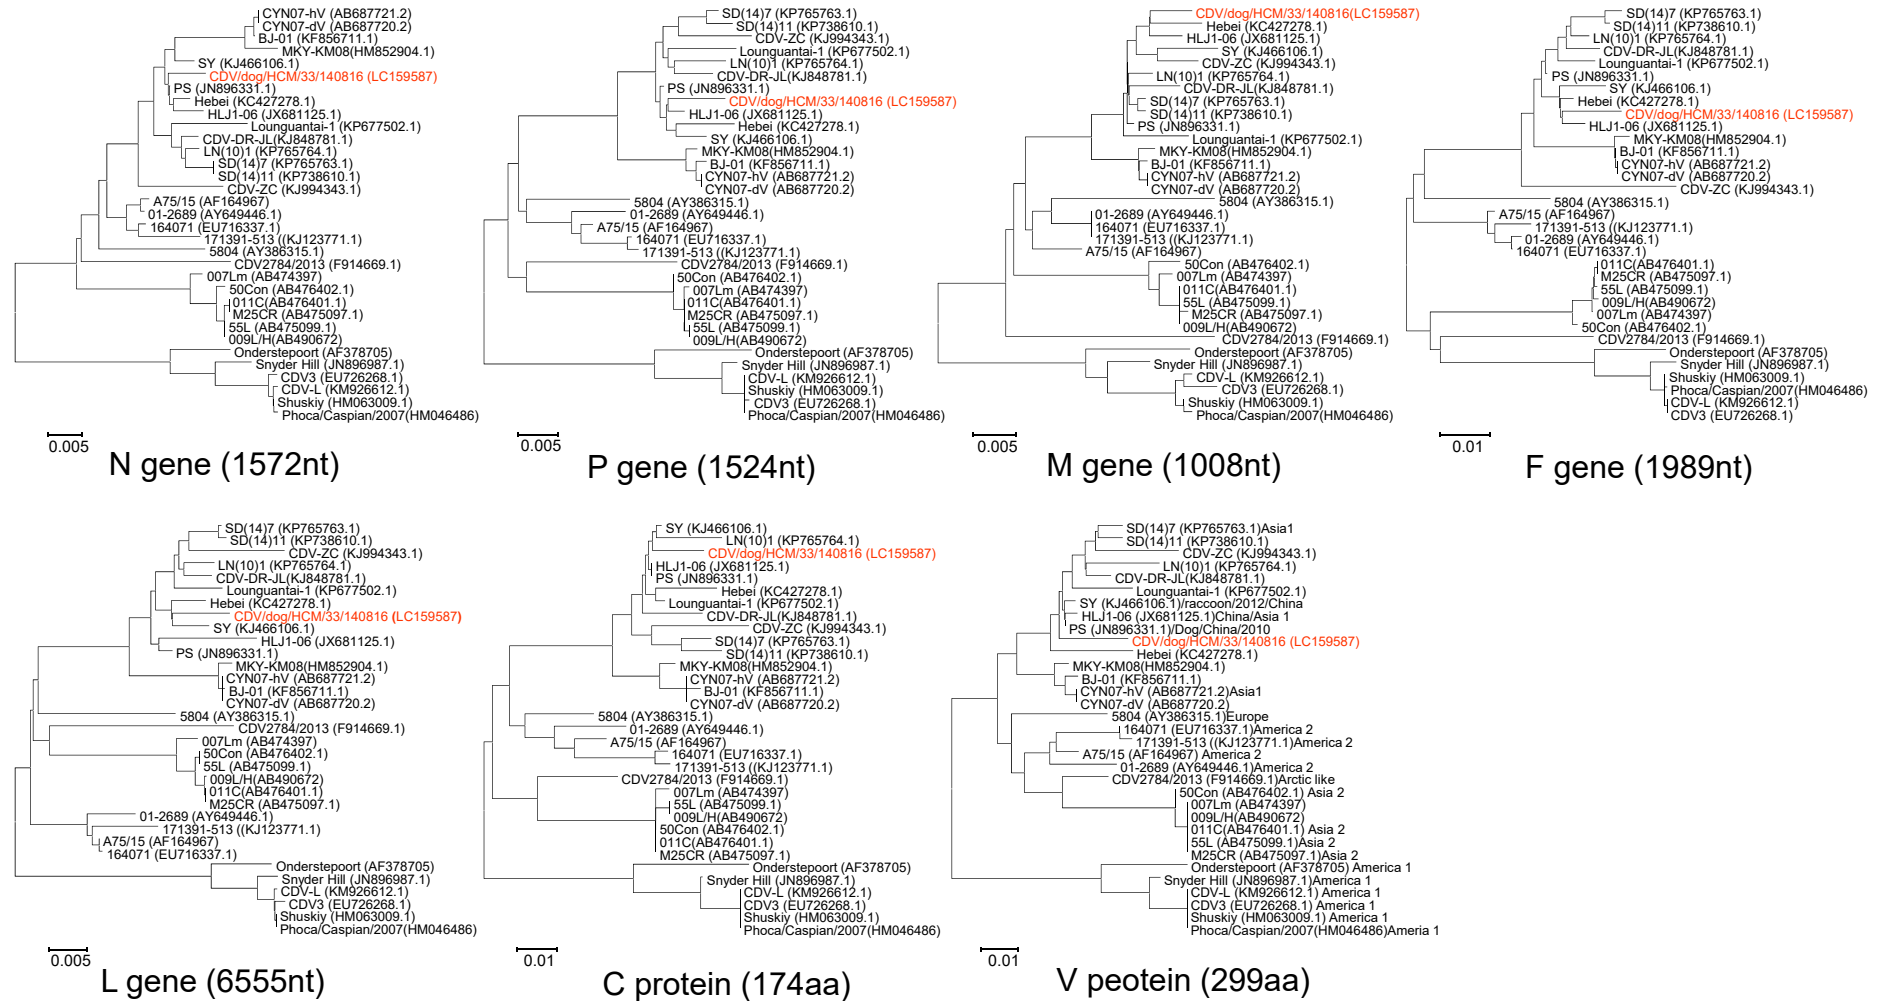

**Fig. S1.** Phylogenetic analysis based on the nucleotide sequences of N, P, M, F and L genes and the amino acids of C and V proteins. The Vietnamese strain, CDV/dog/HCM/33/140816, isolated in this study is shown in red.

| <b>Table S1. Vietnamese dogs from which CDVs were isolated or detected by RT-PCR</b> |                |             |             |        |            |                                  |                             |                  |
|--------------------------------------------------------------------------------------|----------------|-------------|-------------|--------|------------|----------------------------------|-----------------------------|------------------|
| Strains                                                                              | Breeds         | Place       | Age (month) | Sex    | Date       | Clinical sign                    | RT-PCR or isolation         | Accession number |
| CDV/dog/HCM/01/141013                                                                | Vietnamese dog | Thu Duc     | 8           | Male   | 2013/10/18 | Diarrhea, cough, nasal discharge | RT-PCR (feces)              | LC159583         |
| CDV/dog/HCM/24/140112                                                                | Vietnamese dog | District 6  | 4           | Female | 2014/1/12  | Diarrhea                         | RT-PCR (feces)              | LC159584         |
| CDV/dog/HCM/29/140127                                                                | Vietnamese dog | District 10 | 4           | Male   | 2014/1/27  | Diarrhea                         | RT-PCR (feces)              | LC159585         |
| CDV/dog/HCM/33/140816                                                                | Vietnamese dog | Binh Chanh  | 5           | Female | 2014/8/16  | Diarrhea                         | Isolation (eye swab)        | LC159587         |
| CDV/dog/HCM/38/140827                                                                | Vietnamese dog | Binh Tan    | 2           | Female | 2014/8/27  | Cough, diarrhea                  | Isolation (feces, eye swab) | LC159586         |

| Table S2. Percent identity between the nucleotide sequences of CDV/dog/HCM/33/140816 and other CDV strains |                  |              |                  |              |        |      |      |      |      |      |      |        |
|------------------------------------------------------------------------------------------------------------|------------------|--------------|------------------|--------------|--------|------|------|------|------|------|------|--------|
| Strain/genotype                                                                                            | Accession number | Place        | Host/year        | Identity (%) |        |      |      |      |      |      |      |        |
|                                                                                                            |                  |              |                  | Genome       | 5'-NCR | N    | P    | M    | F    | H    | L    | 3'-NCR |
| Asia-1                                                                                                     |                  |              |                  |              |        |      |      |      |      |      |      |        |
| Hebei                                                                                                      | KC427278.1       | China        | Mink/2008        | 98.7         | 98.1   | 99.1 | 98.4 | 98.9 | 98.5 | 98.9 | 98.7 | 99.1   |
| HLJ1-06                                                                                                    | JX681125.1       | China        | Fox/2006         | 98.2         | 97.2   | 98.9 | 99.1 | 99.1 | 98.3 | 98.8 | 97.6 | 99.1   |
| PS                                                                                                         | JN896331.1       | China        | Dog/2010         | 98.6         | 94.4   | 99.4 | 99.1 | 99.1 | 98.2 | 98.7 | 98.6 | 92.5   |
| CYN07-hV                                                                                                   | AB687721.2       | Japan(China) | Monkey/2008      | 97.3         | 99.1   | 98   | 97.7 | 98.3 | 96.6 | 97.2 | 97.5 | 94.3   |
| SD(14)7                                                                                                    | KP765763.1       | China        | Fox/2014         | 97.7         | 98.1   | 98.3 | 98.3 | 99   | 96.8 | 97.2 | 98.1 | 94.3   |
| SY                                                                                                         | KJ466106.1       | China        | Raccoon dog      | 98.5         | 99.1   | 99   | 98.8 | 98.6 | 97.8 | 98.7 | 98.7 | 99.1   |
| Loungantai-1                                                                                               | KP677502.1       | China        | Panda/2015       | 97.8         | 98.1   | 97.8 | 98.1 | 98.4 | 97.4 | 97.4 | 98.1 | 94.3   |
| SD(14)11                                                                                                   | KP738610.1       | China        | Raccoon dog/2014 | 97.7         | 98.1   | 98.3 | 98.1 | 99   | 97   | 97.1 | 98   | 94.3   |
| BJ-01                                                                                                      | KF856711.1       | China        | Monkey/2006      | 97.3         | 97.2   | 98   | 97.6 | 98.3 | 96.6 | 97.1 | 97.4 | 94.3   |
| MKY-KM08                                                                                                   | HM852904.1       | China        | Raccoon dog/2008 | 97.2         | 97.2   | 97.6 | 97.8 | 98.2 | 96.3 | 97.1 | 97.4 | 92.5   |
| LN(10)1                                                                                                    | KP765764.1       | China        | Fox/2010         | 98           | 98.1   | 98.5 | 98.2 | 98.9 | 97.3 | 97.7 | 98.2 | 96.2   |
| CYN07-dV                                                                                                   | AB687720.2       | Japan(China) | Monkey/2008      | 97.3         | 99.1   | 98   | 97.7 | 98.3 | 96.6 | 97.2 | 97.5 | 94.3   |
| CDV-ZC                                                                                                     | KJ994343.1       | China        | Raccoon dog/2013 | 96.8         | 94.4   | 97.6 | 98.1 | 98.4 | 94.8 | 97   | 97.1 | 95.3   |
| CDV-DR-JL                                                                                                  | KJ848781.1       | China        | Raccoon dog/2014 | 98           | 97.2   | 98.6 | 98.4 | 98.6 | 97.2 | 97.9 | 98.2 | 94.3   |
| Asia-2                                                                                                     |                  |              |                  |              |        |      |      |      |      |      |      |        |
| 50Con                                                                                                      | AB476402.1       | Japan        | Dog/2009         | 94.3         | 94.4   | 95.7 | 95.1 | 96.1 | 92.6 | 92.5 | 95   | 90.6   |
| 007Lm                                                                                                      | AB490680.1       | Japan        | Dog/2009         | 94.2         | 94.4   | 96.1 | 94.9 | 96.1 | 92.2 | 92.5 | 95   | 93.4   |
| 011C                                                                                                       | AB476401.1       | Japan        | Dog/2009         | 94.1         | 94.4   | 95.7 | 95   | 96.1 | 92.2 | 92.5 | 94.9 | 90.6   |
| 55L                                                                                                        | AB475099.1       | Japan        | Dog/2009         | 94.2         | 94.4   | 95.7 | 94.9 | 96.1 | 92.2 | 92.4 | 95   | 90.6   |
| M25CR                                                                                                      | AB475097.1       | Japan        | Dog/2009         | 94.1         | 94.4   | 95.7 | 95   | 96   | 92.2 | 92.5 | 94.9 | 90.6   |
| 009L/H                                                                                                     | AB490672         | Japan        | Dog/2010         | 94.1         | 94.4   | 95.7 | 94.9 | 96.1 | 92.1 | 92.4 | 95   | 90.6   |
| Europe                                                                                                     |                  |              |                  |              |        |      |      |      |      |      |      |        |
| 5804                                                                                                       | AY386315.1       | Germany      | Dog/2003         | 95.2         | 93.5   | 97.1 | 96.3 | 96.1 | 93.9 | 95   | 95.5 | 88.7   |
| Arctic                                                                                                     |                  |              |                  |              |        |      |      |      |      |      |      |        |
| CDV2784/2013                                                                                               | KF914669.1       | Italy        | Dog/2013         | 93.8         | 89.7   | 95.8 | 95.3 | 95.4 | 92.2 | 92.8 | 94.6 | 86.8   |
| America-1                                                                                                  |                  |              |                  |              |        |      |      |      |      |      |      |        |
| Onderstepoort                                                                                              | AF378705         | USA          | Dog/2001         | 92.4         | 93.5   | 94   | 93.6 | 94.2 | 90.8 | 91.4 | 93.5 | 88.7   |
| Snyder Hill                                                                                                | JN896987.1       | USA          | Dog/2012         | 92.5         | 96.3   | 93.7 | 93.8 | 94.6 | 90.7 | 91.1 | 93.5 | 86.8   |
| CDV-L                                                                                                      | KM926612.1       | China        | fitchew/1992     | 92.4         | 96.3   | 93.4 | 93.8 | 94.1 | 90.9 | 91.2 | 93.5 | 86.8   |
| CDV3                                                                                                       | EU726268.1       | China        | Mink/2008        | 92.4         | 95.3   | 93.4 | 93.7 | 93.8 | 90.9 | 91.2 | 93.4 | 86.8   |
| Shuskiy                                                                                                    | HM063009.1       | Kazakhstan   | Mink/2007        | 92.4         | 96.3   | 93.5 | 93.8 | 94.2 | 91   | 91.1 | 93.5 | 86.8   |
| Phoca/Caspian/2007                                                                                         | HM046486         | Kazakhstan   | Seal/2007        | 92.4         | 96.3   | 93.4 | 93.7 | 94.1 | 90.9 | 91.1 | 93.5 | 86.8   |
| America-2                                                                                                  |                  |              |                  |              |        |      |      |      |      |      |      |        |
| A75/15                                                                                                     | AF164967         | Switzerland  | Ferret/1999      | 95.9         | 94.4   | 97.8 | 96.6 | 97.4 | 94.2 | 95.2 | 96.3 | 93.4   |
| Jan-89                                                                                                     | AY649446.1       | USA          | Raccoon/2004     | 95.2         | 94.4   | 97.9 | 96.3 | 97.3 | 93.6 | 93.4 | 95.8 | 92.5   |
| 164071                                                                                                     | EU716337.1       | USA          | Dog/2004         | 95.7         | 94.4   | 98   | 96.1 | 97.3 | 93.8 | 94.7 | 96.3 | 93.4   |
| 171391-513                                                                                                 | KJ123771.1       | USA          | Dog/2004         | 95.2         | 94.4   | 97.1 | 96.1 | 97.3 | 93.6 | 94.4 | 95.6 | 93.4   |
